# Supplementary material for: Exploring the Mesenchymal Stem Cell Secretome for Corneal Endothelial Proliferation
Source: Hindawi journal article supplement (doi:10.1155/2020/5891393), 2020-02-05
Supplement: f1 [file 5891393.f1.pdf]

## Supplementary material

|   | A      | B             | C            | D              | E              | F               | G              | H       | I       | J       | K     | L        |
|---|--------|---------------|--------------|----------------|----------------|-----------------|----------------|---------|---------|---------|-------|----------|
| 1 | Pos    | Pos           | Neg          | Neg            | AR             | bFGF            | b-NGF          | EGF     | EGF-R   | FGF-4   | FGF-6 | FGF-7    |
| 2 | Pos    | Pos           | Neg          | Neg            | AR             | bFGF            | b-NGF          | EGF     | EGF-R   | FGF-4   | FGF-6 | FGF-7    |
| 3 | GCSF   | GDNF          | GM-CSF       | HB-EGF         | HGF            | IGFBP-1         | IGFBP-2        | IGFBP-3 | IGFBP-4 | IGFBP-6 | IGF-1 | IGF-1 SR |
| 4 | GCSF   | GDNF          | GM-CSF       | HB-EGF         | HGF            | IGFBP-1         | IGFBP-2        | IGFBP-3 | IGFBP-4 | IGFBP-6 | IGF-1 | IGF-1 SR |
| 5 | IGF-II | M-CSF         | M-CSF-R      | NT-3           | NT-4           | PDGF-R $\alpha$ | PDGF-R $\beta$ | PDGF-AA | PDGF-AB | PDGF-BB | PIGF  | SCF      |
| 6 | IGF-II | M-CSF         | M-CSF-R      | NT-3           | NT-4           | PDGF-R $\alpha$ | PDGF-R $\beta$ | PDGF-AA | PDGF-AB | PDGF-BB | PIGF  | SCF      |
| 7 | SCF-R  | TGF- $\alpha$ | TGF- $\beta$ | TGF- $\beta$ 2 | TGF- $\beta$ 3 | VEGF            | VEGF-R2        | VEGF-R3 | VEGF-D  | Blank   | Blank | Pos      |

Supplementary table 1: The full panel of growth factors that have been tested.
